# Supplementary material
Source: Springer Nature journal article supplement (https://www.springermedizin.de/resource/supplementary/13012_2013_709_MOESM4_ESM.pdf/9630294)
Supplement: MOESM4 [file 9630294]

Regions randomized (n=4)

Regions randomized to control (n=2)

Staff eligible and invited (n=66/154)

Staff allocated to control cluster (n=62/135)

*Missing pre self evaluation (n=17/62)*  
*Missing pre peer evaluation (n=19/62)*

*Withdrew formally from study (n=0)*  
*Missing post self evaluation (n=19/62)*  
*Missing post peer evaluation (n=20/62)*

*Included in primary analysis (n=62)*

Regions randomized to experimental (n=2)

Staff eligible and invited (n=88/154)

Staff allocated to experimental cluster (n=74/135)

*Missing pre self evaluation form (n=15/74)*  
*Missing pre peer evaluation form (n=22/74)*

*Withdrew formally from study (n=1)*  
*Missing post self evaluation form (n=22/73)*  
*Missing post peer evaluation form (n=29/73)*

*Included in primary analysis (n=73)*
